# Supplementary material for: Association between serum tumor necrosis factor-α and sarcopenia in liver cirrhosis
Source: PubMed Central journal article supplement — Clin Mol Hepatol. 2021 Jul 20;28(2):219–31. doi: 10.3350/cmh.2021.0082 (PMC9013623; doi:10.3350/cmh.2021.0082), 2021-07-20
Supplement: cmh-2021-0082-suppl1.pdf [file cmh-2021-0082-suppl1.pdf]

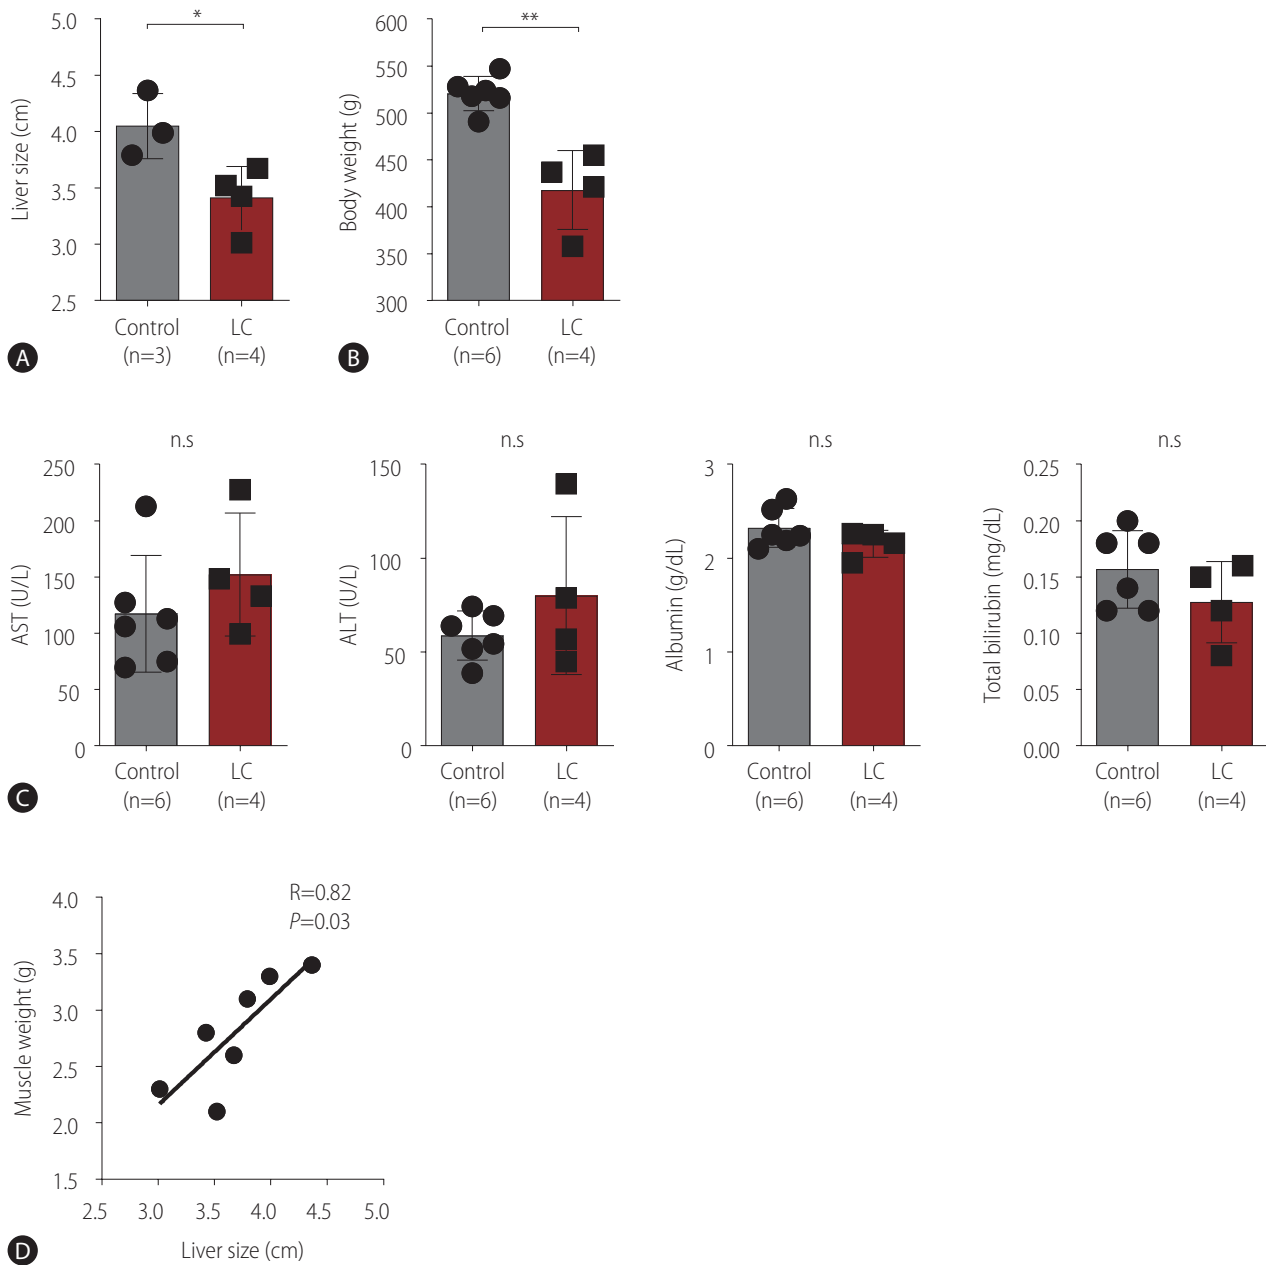

**Supplementary Figure 1.** (A) Comparison of liver sizes between control (n=3) and liver cirrhosis (LC) (n=4) rats. (B) Comparison of body weights between control (n=6) and LC (n=4) rats. (C) Comparison of serum laboratory findings between control (n=6) and LC (n=4) rats. (D) Correlation analysis between muscle weight and liver size (n=7). n.s., not significant; AST, aspartate aminotransferase; ALT, alanine aminotransferase. \* $P < 0.01$ . \*\* $P < 0.001$ .
