# Supplementary material for: Association between serum tumor necrosis factor-α and sarcopenia in liver cirrhosis
Source: PubMed Central journal article supplement — Clin Mol Hepatol. 2021 Jul 20;28(2):219–31. doi: 10.3350/cmh.2021.0082 (PMC9013623; doi:10.3350/cmh.2021.0082), 2021-07-20
Supplement: cmh-2021-0082-suppl2.pdf [file cmh-2021-0082-suppl2.pdf]

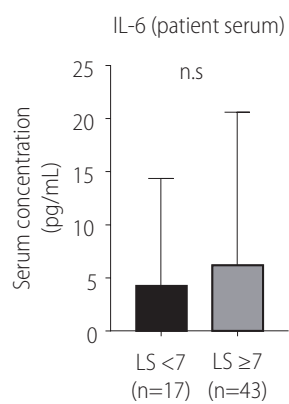

**Supplementary Figure 2.** Comparison of serum interleukin-6 (IL-6) levels in patients with liver stiffness (LS) <7 (n=17) and LS ≥7 (n=43). n.s, not significant.
