# Supplementary material for: Association between serum tumor necrosis factor-α and sarcopenia in liver cirrhosis
Source: PubMed Central journal article supplement — Clin Mol Hepatol. 2021 Jul 20;28(2):219–31. doi: 10.3350/cmh.2021.0082 (PMC9013623; doi:10.3350/cmh.2021.0082), 2021-07-20
Supplement: cmh-2021-0082-suppl3.pdf [file cmh-2021-0082-suppl3.pdf]

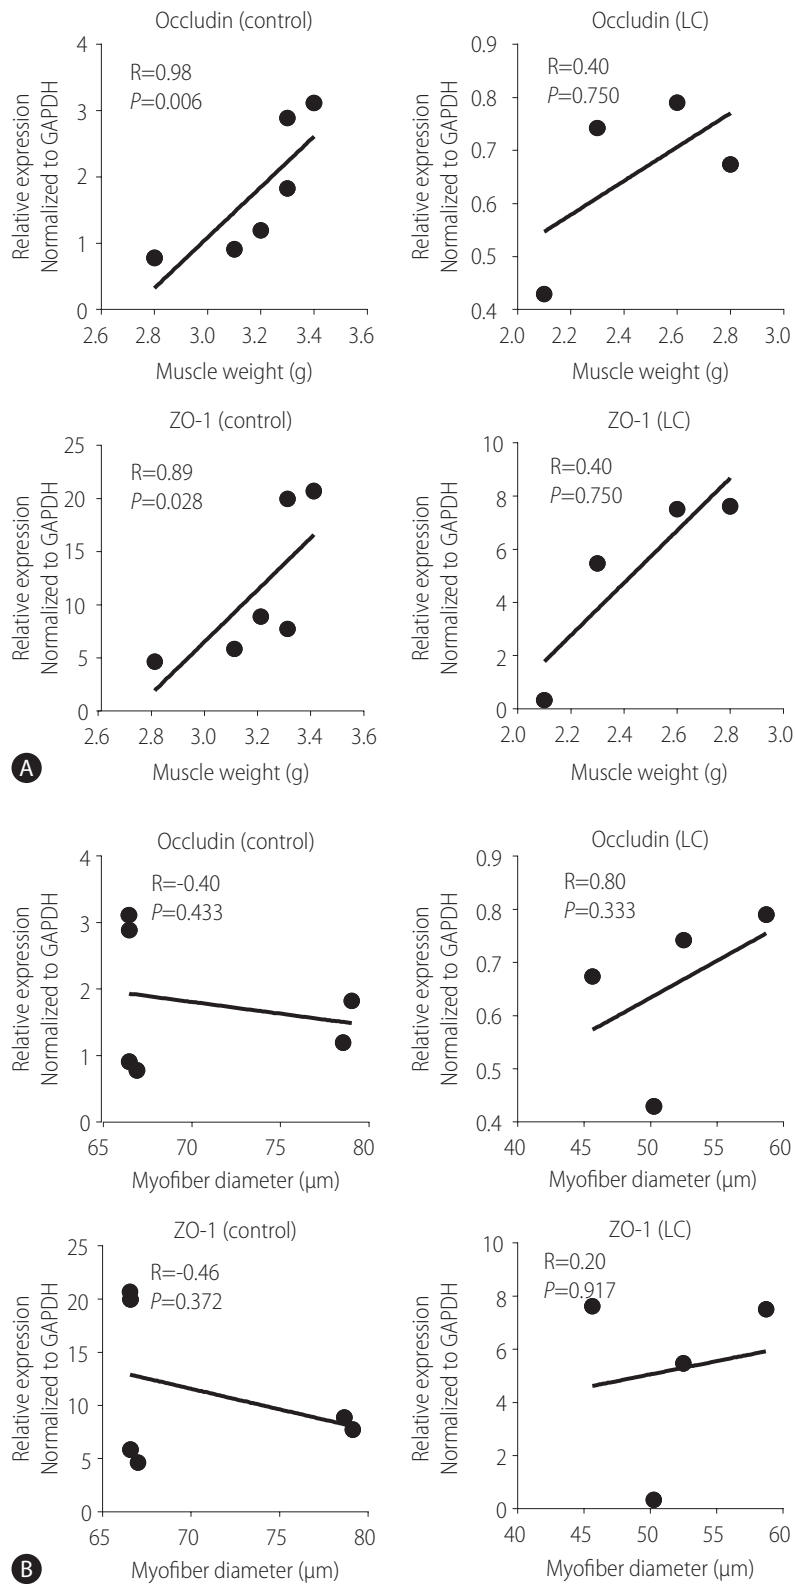

**Supplementary Figure 3.** (A) Correlations between the occludin or zona occludens (ZO)-1 expression and the muscle weight in control (n=6) and liver cirrhosis (LC) (n=4) rats, respectively. (B) Correlations between the occludin or ZO-1 expression and the myofiber diameter in control (n=6) and LC (n=4) rats, respectively.
