# Supplementary material for: Association between serum tumor necrosis factor-α and sarcopenia in liver cirrhosis
Source: PubMed Central journal article supplement — Clin Mol Hepatol. 2021 Jul 20;28(2):219–31. doi: 10.3350/cmh.2021.0082 (PMC9013623; doi:10.3350/cmh.2021.0082), 2021-07-20
Supplement: cmh-2021-0082-suppl4.pdf [file cmh-2021-0082-suppl4.pdf]

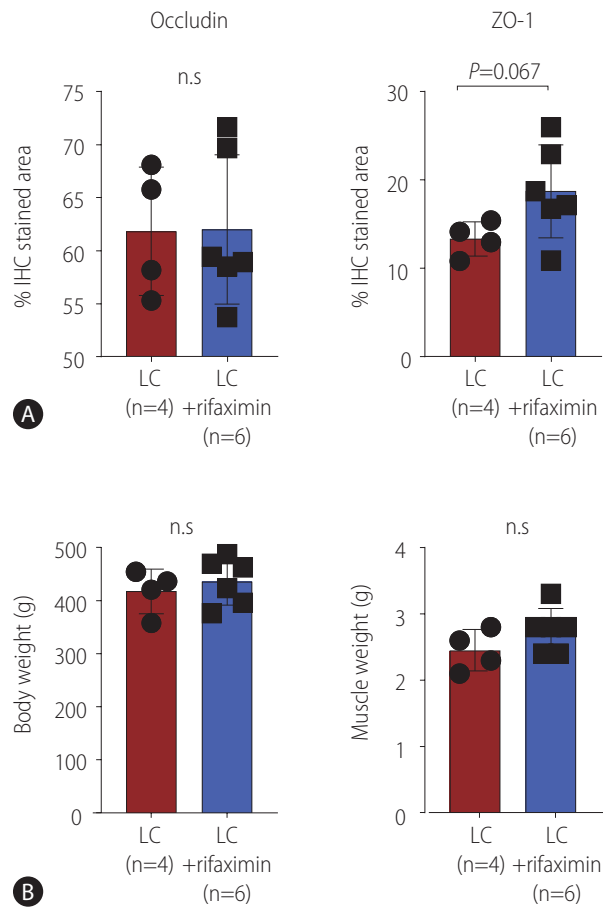

**Supplementary Figure 4.** (A) Immunohistochemistry (IHC) for the myostatin in calf muscle was done in the liver cirrhosis (LC) (n=4) and rifaximin-treated LC (n=6) rats. The graphs comparing the occludin (left) or zona occludens (ZO)-1 (right) stained area in each group are presented. (B) Body and muscle weight were compared in the LC (n=4) and rifaximin-treated LC (n=6) rats. n.s, not significant.
